# Supplementary material for: Rigidity-modulated conformation control: a strategy for incorporating flexible building motifs into metallacycles
Source: Royal Society of Chemistry journal article supplement (doi:10.1039/b702810e), 2007-01-01
Supplement: b702810e.pdf [file b702810e.pdf]

## Rigidity-modulated conformation control: A strategy for incorporating flexible building motifs into metallacycles

Malaichamy Sathiyendiran, Che-Hao Chang, Chuan-Hung Chuang, Tzuoo-Tsair Luo,  
Yuh-Sheng Wen, Kuang-Lieh Lu\*

### Contents

1. Experimental section.
2. **Figure S1.** Partial  $^1\text{H}$  NMR spectra of  $\text{H}_2\text{-Bim}$ ,  $\text{XyBim}$  and **1** (from bottom to top).
3. **Figure S2.** Partial  $^1\text{H}$ - $^1\text{H}$  COSY spectrum of **1**.
4. **Figure S3.** Labeled ORTEP diagram of **1**. Hydrogen atoms were omitted for clarity. Thermal ellipsoids are shown at 35% probability.
5. **Figure S4.** Labeled ORTEP diagram of **2**. Atomic labeling with “A” represents equivalent atoms generated from symmetry code  $(-x+1, -y+1, -z+1)$ . Solvent molecule and hydrogen atoms were omitted for clarity. Thermal ellipsoids are shown at 30% probability.
6. **Figure S5.** One-dimensional supramolecular chain generated by inter molecular  $\pi\cdots\pi$  interactions in compound **2**.
7. **Table S1.** Crystal data and structure refinement for **1**.
8. **Table S2.** Atomic coordinates ( $\times 10^4$ ) and equivalent isotropic displacement parameters ( $\text{\AA}^2 \times 10^3$ ) for **1**.  $U(\text{eq})$  is defined as one third of the trace of the orthogonalized  $U^{ij}$  tensor.
9. **Table S3.** Bond lengths [ $\text{\AA}$ ] and angles [ $^\circ$ ] for **1**.
10. **Table S4.** Anisotropic displacement parameters ( $\text{\AA}^2 \times 10^3$ ) for **1**. The anisotropic displacement factor exponent takes the form:  $-2\pi^2[h^2a^{*2}U^{11} + \dots + 2hk a^* b^* U^{12}]$ .
11. **Table S5.** Crystal data and structure refinement for **2**.
12. **Table S6.** Atomic coordinates ( $\times 10^4$ ) and equivalent isotropic displacement parameters ( $\text{\AA}^2 \times 10^3$ ) for **2**.  $U(\text{eq})$  is defined as one third of the trace of the orthogonalized  $U^{ij}$  tensor.
13. **Table S7.** Bond lengths [ $\text{\AA}$ ] and angles [ $^\circ$ ] for **2**.
14. **Table S8.** Anisotropic displacement parameters ( $\text{\AA}^2 \times 10^3$ ) for **2**. The anisotropic displacement factor exponent takes the form:  $-2\pi^2[h^2a^{*2}U^{11} + \dots + 2hk a^* b^* U^{12}]$ .

## Experimental Section

All starting materials and products were found to be stable toward moisture and air. Commercial grade reagents,  $\text{Re}_2(\text{CO})_{10}$ , 6,11-dihydroxy-5,12-naphthacenedione ( $\text{H}_2\text{-dhnq}$ ), and solvents were used as received. The ligands 2,2'-bisbenzimidazolyl ( $\text{H}_2\text{-Bim}$ ) and  $\alpha,\alpha'$ -bis(benzimidazol-1-yl)-*o*-xylene ( $\text{XyBim}$ ) were synthesized by published methods.<sup>S1,S2</sup>  $\text{H}_2\text{-Bim}$  was obtained from the reaction of hexachloroacetone with 1,2-phenylenediamine in ethyleneglycol. The ligand  $\text{XyBim}$  was synthesized from the reaction of benzimidazole with  $\alpha,\alpha'$ -dibromo-*p*-xylene. Elemental analyses were performed on a Perkin-Elmer 2400 CHN elemental analyzer. Infrared spectra were recorded on a Perkin-Elmer FT-IR Spectrometer PARAGON 1000.  $^1\text{H}$  NMR spectra were recorded on a Bruker AMX-400 FT-NMR spectrometer. FAB-MS data were obtained using a JEOL JMS-700 double focusing mass spectrometer.

## References

- S1. M. C. Rezende, E. L. Dall'Oglio, *Tetrahedron Lett.*, 1996, **37**, 5265–5268.  
S2. Z. Shi, R. P. Thummel, *J. Org. Chem.*, 1995, **60**, 5935–5945.

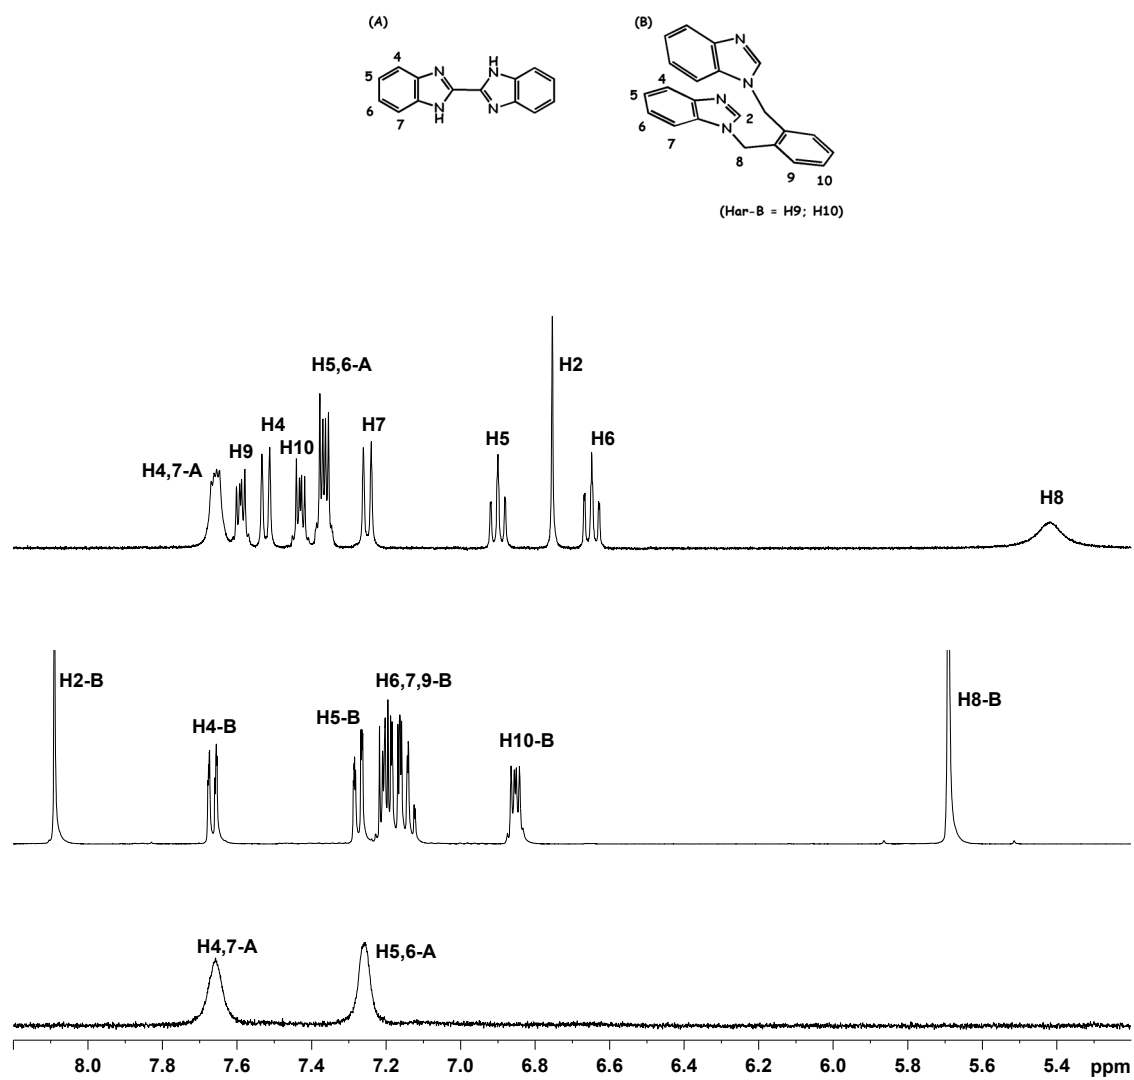

Figure S1. Partial  $^1\text{H}$  NMR spectra of H<sub>2</sub>-Bim, XyBim and **1** (from bottom to top).

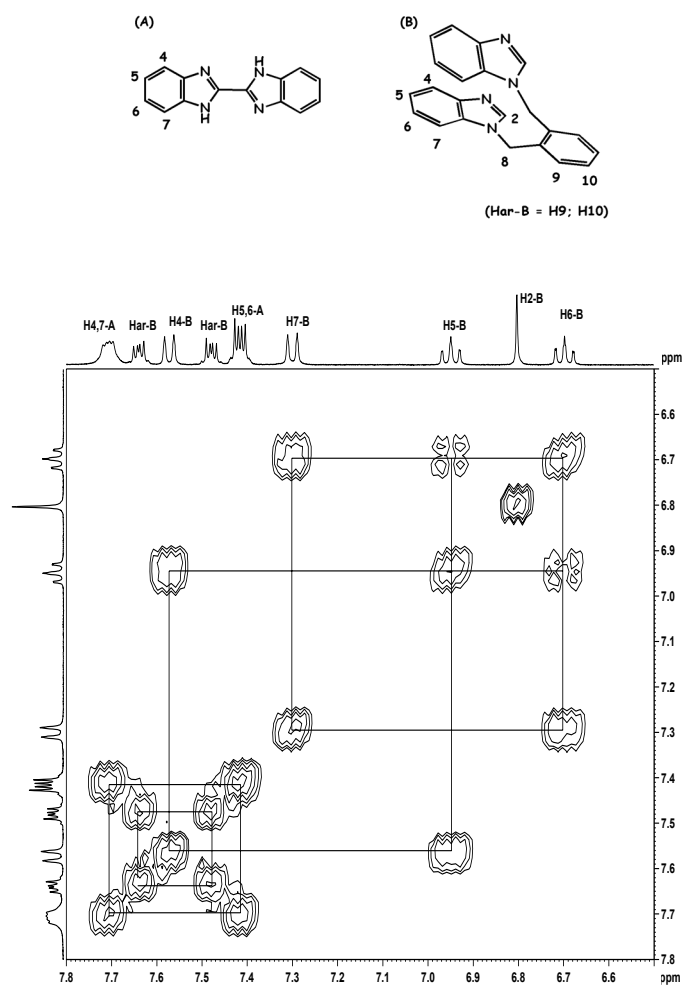

Figure S2. Partial  $^1\text{H}$ - $^1\text{H}$  COSY spectrum of **1**.

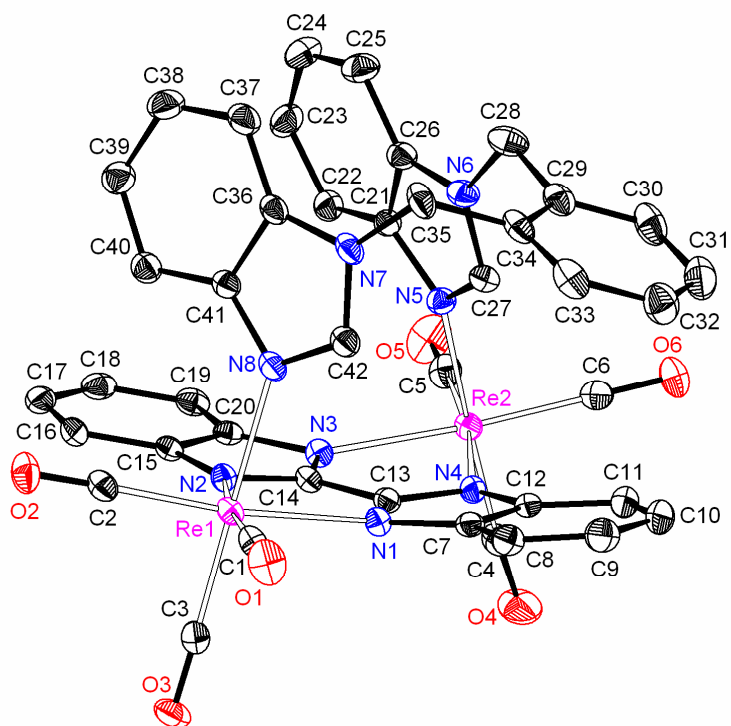

**Figure S3.** Labeled ORTEP diagram of **1**. Hydrogen atoms were omitted for clarity. Thermal ellipsoids are shown at 30% probability.

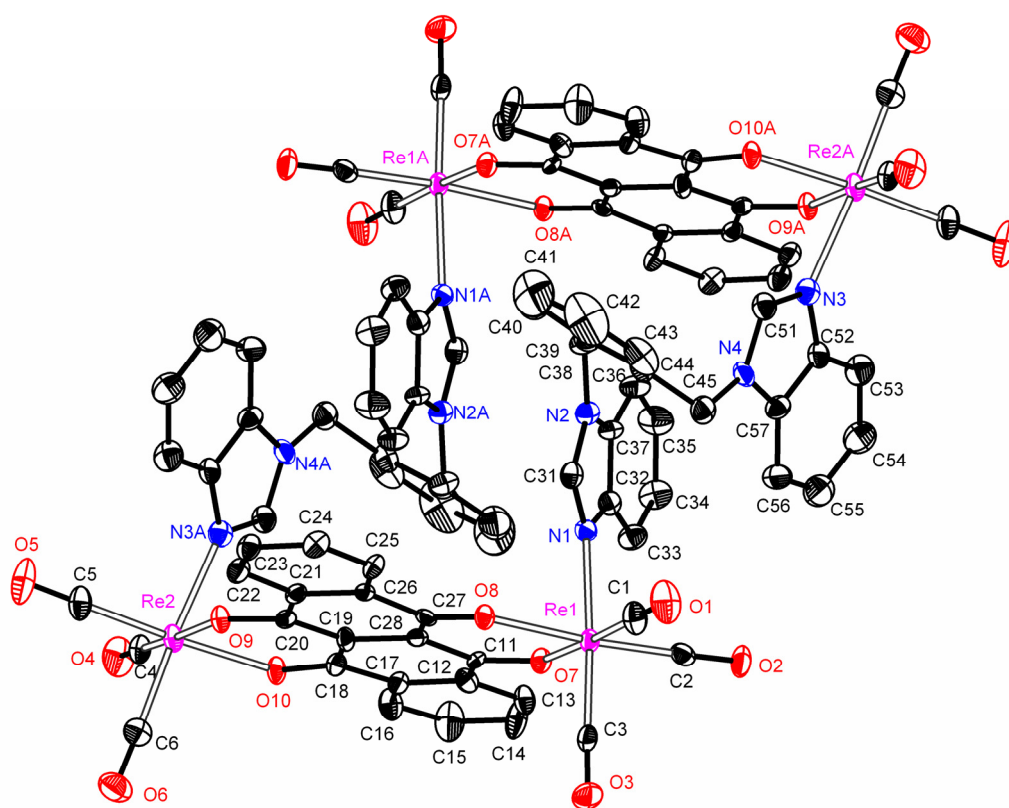

**Figure S4.** Labeled ORTEP diagram of **2**. Atomic labeling with “A” represents equivalent atoms generated from symmetry code (-x+1, -y+1, -z+1). Solvent molecule and hydrogen atoms were omitted for clarity. Thermal ellipsoids are shown at 30% probability.

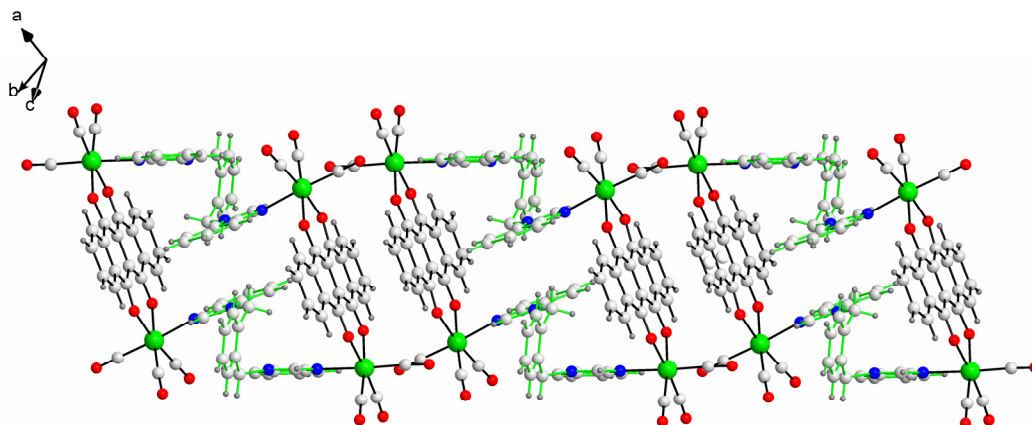

**Figure S5.** One-dimensional supramolecular chain generated by inter molecular  $\pi \cdots \pi$  interactions in compound **2**.

**# Supplementary Material (ESI) for Dalton Transactions**  
**# This journal is (c) The Royal Society of Chemistry 2007**

**Table S1.** Crystal data and structure refinement for **1**.

|                                                     |                                                                               |                        |
|-----------------------------------------------------|-------------------------------------------------------------------------------|------------------------|
| Identification code                                 | 3609                                                                          |                        |
| Empirical formula                                   | C <sub>42</sub> H <sub>26</sub> N <sub>8</sub> O <sub>6</sub> Re <sub>2</sub> |                        |
| Formula weight                                      | 1111.11                                                                       |                        |
| Temperature                                         | 293(2) K                                                                      |                        |
| Wavelength                                          | 0.71073 Å                                                                     |                        |
| Crystal system                                      | Monoclinic                                                                    |                        |
| Space group                                         | <i>P</i> 2 <sub>1</sub> / <i>n</i>                                            |                        |
| Unit cell dimensions                                | <i>a</i> = 18.82300(10) Å                                                     | $\alpha = 90^\circ$    |
|                                                     | <i>b</i> = 10.48100(10) Å                                                     | $\beta = 114.59^\circ$ |
|                                                     | <i>c</i> = 21.4330(2) Å                                                       | $\gamma = 90^\circ$    |
| Volume                                              | 3844.94(6) Å <sup>3</sup>                                                     |                        |
| <i>Z</i>                                            | 4                                                                             |                        |
| Density (calculated)                                | 1.919 Mg/m <sup>3</sup>                                                       |                        |
| Absorption coefficient                              | 6.351 mm <sup>-1</sup>                                                        |                        |
| <i>F</i> (000)                                      | 2128                                                                          |                        |
| Crystal size                                        | 0.25 x 0.15 x 0.1 mm <sup>3</sup>                                             |                        |
| Theta range for data collection                     | 2.09 to 25.03°.                                                               |                        |
| Index ranges                                        | -22 ≤ <i>h</i> ≤ 17, -11 ≤ <i>k</i> ≤ 12, -19 ≤ <i>l</i> ≤ 25                 |                        |
| Reflections collected                               | 21160                                                                         |                        |
| Independent reflections                             | 6777 [ <i>R</i> (int) = 0.0416]                                               |                        |
| Completeness to theta = 25.03°                      | 99.6 %                                                                        |                        |
| Absorption correction                               | Semi-empirical from equivalents                                               |                        |
| Max. and min. transmission                          | 0.4596 and 0.2654                                                             |                        |
| Refinement method                                   | Full-matrix least-squares on <i>F</i> <sup>2</sup>                            |                        |
| Data / restraints / parameters                      | 6777 / 0 / 523                                                                |                        |
| Goodness-of-fit on <i>F</i> <sup>2</sup>            | 1.197                                                                         |                        |
| Final <i>R</i> indices [ <i>I</i> > 2σ( <i>I</i> )] | <i>R</i> 1 = 0.0263, <i>wR</i> 2 = 0.0651                                     |                        |
| <i>R</i> indices (all data)                         | <i>R</i> 1 = 0.0350, <i>wR</i> 2 = 0.0738                                     |                        |
| Largest diff. peak and hole                         | 1.164 and -2.175 e.Å <sup>-3</sup>                                            |                        |



**Table S2.** Atomic coordinates ( $\times 10^4$ ) and equivalent isotropic displacement parameters ( $\text{\AA}^2 \times 10^3$ ) for **1**. U(eq) is defined as one third of the trace of the orthogonalized  $U^{ij}$  tensor.

|       | x        | y       | z       | U(eq) |
|-------|----------|---------|---------|-------|
| Re(1) | -1485(1) | 4086(1) | 2731(1) | 36(1) |
| Re(2) | 1736(1)  | 3872(1) | 3236(1) | 37(1) |
| O(1)  | -2376(2) | 5485(4) | 3435(2) | 74(1) |
| O(2)  | -3016(2) | 3523(4) | 1487(2) | 66(1) |
| O(3)  | -1777(2) | 1618(3) | 3346(2) | 61(1) |
| O(4)  | 2525(2)  | 1723(4) | 4258(2) | 93(2) |
| O(5)  | 2553(3)  | 2906(5) | 2356(2) | 86(1) |
| O(6)  | 3200(2)  | 5422(4) | 4089(2) | 77(1) |
| N(1)  | -312(2)  | 4564(3) | 3534(2) | 38(1) |
| N(2)  | -695(2)  | 3133(3) | 2344(2) | 36(1) |
| N(3)  | 606(2)   | 2940(3) | 2587(2) | 37(1) |
| N(4)  | 975(2)   | 4455(3) | 3741(2) | 37(1) |
| N(5)  | 1174(2)  | 5530(3) | 2586(2) | 39(1) |
| N(6)  | 767(2)   | 7536(3) | 2329(2) | 45(1) |
| N(7)  | -1071(2) | 7936(3) | 2226(2) | 48(1) |
| N(8)  | -1270(2) | 5866(3) | 2288(2) | 43(1) |
| C(1)  | -2041(3) | 4970(5) | 3164(3) | 48(1) |
| C(2)  | -2436(3) | 3743(4) | 1947(3) | 46(1) |
| C(3)  | -1652(3) | 2537(5) | 3123(2) | 44(1) |
| C(4)  | 2211(3)  | 2506(5) | 3859(3) | 55(1) |
| C(5)  | 2251(3)  | 3292(5) | 2692(3) | 53(1) |
| C(6)  | 2641(3)  | 4853(5) | 3767(2) | 49(1) |
| C(7)  | 105(3)   | 5364(4) | 4089(2) | 40(1) |
| C(8)  | -138(3)  | 6171(4) | 4483(3) | 50(1) |
| C(9)  | 417(4)   | 6873(5) | 4984(3) | 63(2) |
| C(10) | 1205(4)  | 6786(5) | 5116(3) | 63(2) |
| C(11) | 1462(3)  | 5996(5) | 4741(3) | 55(1) |
| C(12) | 900(3)   | 5281(4) | 4216(2) | 39(1) |
| C(13) | 239(3)   | 4098(4) | 3369(2) | 36(1) |

**# Supplementary Material (ESI) for Dalton Transactions**  
**# This journal is (c) The Royal Society of Chemistry 2007**

|       |          |         |         |       |
|-------|----------|---------|---------|-------|
| C(14) | 49(2)    | 3348(4) | 2767(2) | 35(1) |
| C(15) | -624(3)  | 2462(4) | 1812(2) | 36(1) |
| C(16) | -1187(3) | 1968(4) | 1205(2) | 44(1) |
| C(17) | -931(4)  | 1372(4) | 761(2)  | 53(1) |
| C(18) | -137(4)  | 1242(4) | 914(3)  | 51(1) |
| C(19) | 426(3)   | 1721(4) | 1509(2) | 46(1) |
| C(20) | 180(3)   | 2342(4) | 1960(2) | 38(1) |
| C(21) | 984(3)   | 5733(4) | 1893(2) | 40(1) |
| C(22) | 1008(3)  | 4926(5) | 1392(2) | 48(1) |
| C(23) | 802(3)   | 5421(6) | 747(3)  | 59(1) |
| C(24) | 573(4)   | 6688(6) | 597(3)  | 68(2) |
| C(25) | 537(3)   | 7501(5) | 1077(3) | 62(2) |
| C(26) | 737(3)   | 6994(4) | 1732(2) | 43(1) |
| C(27) | 1031(3)  | 6639(4) | 2814(2) | 42(1) |
| C(28) | 672(4)   | 8906(4) | 2416(3) | 59(2) |
| C(29) | 592(3)   | 9245(4) | 3066(3) | 52(1) |
| C(30) | 1264(3)  | 9436(5) | 3658(3) | 67(2) |
| C(31) | 1218(4)  | 9761(6) | 4267(3) | 78(2) |
| C(32) | 510(4)   | 9953(6) | 4280(3) | 73(2) |
| C(33) | -162(3)  | 9779(5) | 3696(3) | 64(2) |
| C(34) | -132(3)  | 9422(4) | 3082(3) | 50(1) |
| C(35) | -891(3)  | 9280(4) | 2461(3) | 59(2) |
| C(36) | -1291(3) | 7459(4) | 1570(3) | 47(1) |
| C(37) | -1391(3) | 8033(5) | 958(3)  | 62(2) |
| C(38) | -1593(3) | 7250(6) | 394(3)  | 68(2) |
| C(39) | -1706(3) | 5947(5) | 437(3)  | 58(1) |
| C(40) | -1624(3) | 5377(5) | 1033(2) | 49(1) |
| C(41) | -1411(3) | 6155(4) | 1616(2) | 40(1) |
| C(42) | -1071(3) | 6957(4) | 2629(3) | 47(1) |

---

**Table S3.** Bond lengths [ $\text{\AA}$ ] and angles [ $^\circ$ ] for **1**.

---

|            |          |
|------------|----------|
| Re(1)-C(1) | 1.904(5) |
| Re(1)-C(3) | 1.913(5) |
| Re(1)-C(2) | 1.912(5) |
| Re(1)-N(8) | 2.206(4) |
| Re(1)-N(1) | 2.218(3) |
| Re(1)-N(2) | 2.220(3) |
| Re(2)-C(5) | 1.900(6) |
| Re(2)-C(6) | 1.908(5) |
| Re(2)-C(4) | 1.908(5) |
| Re(2)-N(5) | 2.203(3) |
| Re(2)-N(4) | 2.211(4) |
| Re(2)-N(3) | 2.226(3) |
| O(1)-C(1)  | 1.153(6) |
| O(2)-C(2)  | 1.150(6) |
| O(3)-C(3)  | 1.143(6) |
| O(4)-C(4)  | 1.154(6) |
| O(5)-C(5)  | 1.160(6) |
| O(6)-C(6)  | 1.156(6) |
| N(1)-C(13) | 1.321(5) |
| N(1)-C(7)  | 1.399(5) |
| N(2)-C(14) | 1.332(5) |
| N(2)-C(15) | 1.392(5) |
| N(3)-C(14) | 1.329(5) |
| N(3)-C(20) | 1.394(5) |
| N(4)-C(13) | 1.333(6) |
| N(4)-C(12) | 1.388(5) |
| N(5)-C(27) | 1.331(6) |
| N(5)-C(21) | 1.391(6) |
| N(6)-C(27) | 1.336(6) |
| N(6)-C(26) | 1.379(6) |
| N(6)-C(28) | 1.468(6) |
| N(7)-C(42) | 1.341(6) |
| N(7)-C(36) | 1.383(6) |

**# Supplementary Material (ESI) for Dalton Transactions**  
**# This journal is (c) The Royal Society of Chemistry 2007**

|             |          |
|-------------|----------|
| N(7)-C(35)  | 1.487(6) |
| N(8)-C(42)  | 1.324(6) |
| N(8)-C(41)  | 1.385(6) |
| C(7)-C(8)   | 1.400(6) |
| C(7)-C(12)  | 1.409(6) |
| C(8)-C(9)   | 1.360(7) |
| C(9)-C(10)  | 1.393(8) |
| C(10)-C(11) | 1.374(8) |
| C(11)-C(12) | 1.399(6) |
| C(13)-C(14) | 1.424(6) |
| C(15)-C(16) | 1.391(6) |
| C(15)-C(20) | 1.417(7) |
| C(16)-C(17) | 1.383(7) |
| C(17)-C(18) | 1.398(8) |
| C(18)-C(19) | 1.371(7) |
| C(19)-C(20) | 1.393(6) |
| C(21)-C(22) | 1.383(6) |
| C(21)-C(26) | 1.396(6) |
| C(22)-C(23) | 1.371(7) |
| C(23)-C(24) | 1.392(8) |
| C(24)-C(25) | 1.359(8) |
| C(25)-C(26) | 1.399(7) |
| C(28)-C(29) | 1.504(8) |
| C(29)-C(30) | 1.383(8) |
| C(29)-C(34) | 1.391(8) |
| C(30)-C(31) | 1.386(9) |
| C(31)-C(32) | 1.361(8) |
| C(32)-C(33) | 1.372(8) |
| C(33)-C(34) | 1.390(8) |
| C(34)-C(35) | 1.501(7) |
| C(36)-C(37) | 1.382(7) |
| C(36)-C(41) | 1.395(6) |
| C(37)-C(38) | 1.377(8) |
| C(38)-C(39) | 1.391(7) |
| C(39)-C(40) | 1.360(7) |

**# Supplementary Material (ESI) for Dalton Transactions**  
**# This journal is (c) The Royal Society of Chemistry 2007**

|                  |            |
|------------------|------------|
| C(40)-C(41)      | 1.404(7)   |
| C(1)-Re(1)-C(3)  | 88.58(19)  |
| C(1)-Re(1)-C(2)  | 90.9(2)    |
| C(3)-Re(1)-C(2)  | 87.77(19)  |
| C(1)-Re(1)-N(8)  | 91.98(18)  |
| C(3)-Re(1)-N(8)  | 179.04(17) |
| C(2)-Re(1)-N(8)  | 93.00(17)  |
| C(1)-Re(1)-N(1)  | 94.81(17)  |
| C(3)-Re(1)-N(1)  | 98.31(16)  |
| C(2)-Re(1)-N(1)  | 171.72(18) |
| N(8)-Re(1)-N(1)  | 80.86(14)  |
| C(1)-Re(1)-N(2)  | 172.49(17) |
| C(3)-Re(1)-N(2)  | 92.34(16)  |
| C(2)-Re(1)-N(2)  | 96.55(17)  |
| N(8)-Re(1)-N(2)  | 87.01(14)  |
| N(1)-Re(1)-N(2)  | 77.68(13)  |
| C(5)-Re(2)-C(6)  | 88.9(2)    |
| C(5)-Re(2)-C(4)  | 88.9(2)    |
| C(6)-Re(2)-C(4)  | 86.8(2)    |
| C(5)-Re(2)-N(5)  | 95.60(18)  |
| C(6)-Re(2)-N(5)  | 91.55(17)  |
| C(4)-Re(2)-N(5)  | 175.24(19) |
| C(5)-Re(2)-N(4)  | 171.50(17) |
| C(6)-Re(2)-N(4)  | 99.11(17)  |
| C(4)-Re(2)-N(4)  | 94.27(19)  |
| N(5)-Re(2)-N(4)  | 81.56(13)  |
| C(5)-Re(2)-N(3)  | 94.31(18)  |
| C(6)-Re(2)-N(3)  | 173.41(17) |
| C(4)-Re(2)-N(3)  | 98.94(17)  |
| N(5)-Re(2)-N(3)  | 82.43(13)  |
| N(4)-Re(2)-N(3)  | 77.41(13)  |
| C(13)-N(1)-C(7)  | 103.0(4)   |
| C(13)-N(1)-Re(1) | 110.3(3)   |
| C(7)-N(1)-Re(1)  | 145.1(3)   |

**# Supplementary Material (ESI) for Dalton Transactions**  
**# This journal is (c) The Royal Society of Chemistry 2007**

|                   |          |
|-------------------|----------|
| C(14)-N(2)-C(15)  | 102.2(4) |
| C(14)-N(2)-Re(1)  | 110.3(3) |
| C(15)-N(2)-Re(1)  | 147.3(3) |
| C(14)-N(3)-C(20)  | 102.6(4) |
| C(14)-N(3)-Re(2)  | 110.0(3) |
| C(20)-N(3)-Re(2)  | 144.7(3) |
| C(13)-N(4)-C(12)  | 102.5(4) |
| C(13)-N(4)-Re(2)  | 110.7(3) |
| C(12)-N(4)-Re(2)  | 144.7(3) |
| C(27)-N(5)-C(21)  | 104.9(4) |
| C(27)-N(5)-Re(2)  | 125.0(3) |
| C(21)-N(5)-Re(2)  | 129.7(3) |
| C(27)-N(6)-C(26)  | 106.9(4) |
| C(27)-N(6)-C(28)  | 127.9(4) |
| C(26)-N(6)-C(28)  | 124.2(4) |
| C(42)-N(7)-C(36)  | 107.3(4) |
| C(42)-N(7)-C(35)  | 124.5(4) |
| C(36)-N(7)-C(35)  | 128.1(4) |
| C(42)-N(8)-C(41)  | 105.8(4) |
| C(42)-N(8)-Re(1)  | 123.6(3) |
| C(41)-N(8)-Re(1)  | 130.0(3) |
| O(1)-C(1)-Re(1)   | 178.6(5) |
| O(2)-C(2)-Re(1)   | 178.2(5) |
| O(3)-C(3)-Re(1)   | 177.9(4) |
| O(4)-C(4)-Re(2)   | 176.6(5) |
| O(5)-C(5)-Re(2)   | 178.0(5) |
| O(6)-C(6)-Re(2)   | 178.3(5) |
| N(1)-C(7)-C(8)    | 131.8(5) |
| N(1)-C(7)-C(12)   | 107.6(4) |
| C(8)-C(7)-C(12)   | 120.5(4) |
| C(9)-C(8)-C(7)    | 117.8(5) |
| C(8)-C(9)-C(10)   | 121.9(5) |
| C(11)-C(10)-C(9)  | 121.6(5) |
| C(10)-C(11)-C(12) | 117.4(5) |
| N(4)-C(12)-C(11)  | 130.6(5) |

**# Supplementary Material (ESI) for Dalton Transactions**  
**# This journal is (c) The Royal Society of Chemistry 2007**

|                   |          |
|-------------------|----------|
| N(4)-C(12)-C(7)   | 108.7(4) |
| C(11)-C(12)-C(7)  | 120.7(4) |
| N(1)-C(13)-N(4)   | 118.2(4) |
| N(1)-C(13)-C(14)  | 121.2(4) |
| N(4)-C(13)-C(14)  | 120.3(4) |
| N(3)-C(14)-N(2)   | 118.7(4) |
| N(3)-C(14)-C(13)  | 120.7(4) |
| N(2)-C(14)-C(13)  | 120.4(4) |
| N(2)-C(15)-C(16)  | 131.1(4) |
| N(2)-C(15)-C(20)  | 108.6(4) |
| C(16)-C(15)-C(20) | 120.3(4) |
| C(17)-C(16)-C(15) | 117.6(5) |
| C(16)-C(17)-C(18) | 121.9(5) |
| C(19)-C(18)-C(17) | 121.3(5) |
| C(18)-C(19)-C(20) | 117.8(5) |
| C(19)-C(20)-N(3)  | 130.9(4) |
| C(19)-C(20)-C(15) | 121.2(4) |
| N(3)-C(20)-C(15)  | 107.9(4) |
| C(22)-C(21)-C(26) | 120.1(4) |
| C(22)-C(21)-N(5)  | 131.2(4) |
| C(26)-C(21)-N(5)  | 108.7(4) |
| C(23)-C(22)-C(21) | 117.7(5) |
| C(22)-C(23)-C(24) | 121.6(5) |
| C(25)-C(24)-C(23) | 122.1(5) |
| C(24)-C(25)-C(26) | 116.4(5) |
| N(6)-C(26)-C(21)  | 106.2(4) |
| N(6)-C(26)-C(25)  | 131.6(4) |
| C(21)-C(26)-C(25) | 122.1(5) |
| N(6)-C(27)-N(5)   | 113.2(4) |
| N(6)-C(28)-C(29)  | 114.5(4) |
| C(30)-C(29)-C(34) | 119.3(5) |
| C(30)-C(29)-C(28) | 118.6(5) |
| C(34)-C(29)-C(28) | 122.1(5) |
| C(29)-C(30)-C(31) | 120.5(6) |
| C(32)-C(31)-C(30) | 120.1(6) |

**# Supplementary Material (ESI) for Dalton Transactions**  
**# This journal is (c) The Royal Society of Chemistry 2007**

|                   |          |
|-------------------|----------|
| C(33)-C(32)-C(31) | 120.0(6) |
| C(32)-C(33)-C(34) | 121.0(5) |
| C(29)-C(34)-C(33) | 119.1(5) |
| C(29)-C(34)-C(35) | 123.1(5) |
| C(33)-C(34)-C(35) | 117.8(5) |
| N(7)-C(35)-C(34)  | 113.2(4) |
| C(37)-C(36)-N(7)  | 132.2(4) |
| C(37)-C(36)-C(41) | 122.1(5) |
| N(7)-C(36)-C(41)  | 105.7(4) |
| C(38)-C(37)-C(36) | 116.9(5) |
| C(37)-C(38)-C(39) | 121.4(5) |
| C(40)-C(39)-C(38) | 122.2(5) |
| C(39)-C(40)-C(41) | 117.4(5) |
| N(8)-C(41)-C(36)  | 108.8(4) |
| N(8)-C(41)-C(40)  | 131.2(4) |
| C(36)-C(41)-C(40) | 120.1(4) |
| N(8)-C(42)-N(7)   | 112.4(4) |

---

Symmetry transformations used to generate equivalent atoms:



**Table S4.** Anisotropic displacement parameters ( $\text{\AA}^2 \times 10^3$ ) for **1**. The anisotropic displacement factor exponent takes the form:  $-2\pi^2[h^2a^{*2}U^{11} + \dots + 2hk a^* b^* U^{12}]$ .

|       | U11   | U22    | U33    | U23    | U13   | U12    |
|-------|-------|--------|--------|--------|-------|--------|
| Re(1) | 31(1) | 33(1)  | 46(1)  | -1(1)  | 18(1) | -3(1)  |
| Re(2) | 29(1) | 37(1)  | 44(1)  | 5(1)   | 13(1) | 3(1)   |
| O(1)  | 60(2) | 78(3)  | 94(3)  | -25(2) | 43(2) | 4(2)   |
| O(2)  | 42(2) | 68(2)  | 70(3)  | -10(2) | 6(2)  | -7(2)  |
| O(3)  | 75(3) | 40(2)  | 73(2)  | 6(2)   | 37(2) | -12(2) |
| O(4)  | 65(3) | 73(3)  | 115(4) | 50(3)  | 12(3) | 10(2)  |
| O(5)  | 61(3) | 122(4) | 84(3)  | -7(3)  | 39(2) | 31(3)  |
| O(6)  | 51(2) | 86(3)  | 82(3)  | -9(2)  | 15(2) | -28(2) |
| N(1)  | 36(2) | 38(2)  | 41(2)  | -3(2)  | 16(2) | -3(2)  |
| N(2)  | 31(2) | 38(2)  | 39(2)  | -3(2)  | 14(2) | -3(2)  |
| N(3)  | 34(2) | 37(2)  | 41(2)  | -1(2)  | 16(2) | 1(2)   |
| N(4)  | 34(2) | 41(2)  | 36(2)  | -1(2)  | 14(2) | -4(2)  |
| N(5)  | 39(2) | 38(2)  | 40(2)  | 6(2)   | 16(2) | 3(2)   |
| N(6)  | 47(2) | 35(2)  | 54(2)  | 8(2)   | 22(2) | 4(2)   |
| N(7)  | 37(2) | 31(2)  | 64(3)  | 5(2)   | 9(2)  | -3(2)  |
| N(8)  | 36(2) | 34(2)  | 55(3)  | 2(2)   | 14(2) | -4(2)  |
| C(1)  | 42(3) | 41(3)  | 60(3)  | -5(2)  | 20(2) | -7(2)  |
| C(2)  | 41(3) | 36(2)  | 61(3)  | 0(2)   | 21(3) | -1(2)  |
| C(3)  | 39(3) | 51(3)  | 46(3)  | -10(2) | 22(2) | -3(2)  |
| C(4)  | 37(3) | 50(3)  | 69(3)  | 11(3)  | 12(3) | -1(2)  |
| C(5)  | 39(3) | 58(3)  | 59(3)  | 2(2)   | 16(3) | 8(2)   |
| C(6)  | 48(3) | 50(3)  | 52(3)  | 7(2)   | 23(2) | 3(3)   |
| C(7)  | 49(3) | 38(2)  | 35(2)  | 2(2)   | 21(2) | -3(2)  |
| C(8)  | 58(3) | 47(3)  | 50(3)  | -4(2)  | 29(3) | 0(2)   |
| C(9)  | 92(5) | 50(3)  | 53(3)  | -14(2) | 37(3) | -8(3)  |
| C(10) | 79(4) | 63(3)  | 43(3)  | -14(2) | 20(3) | -22(3) |
| C(11) | 53(3) | 65(3)  | 41(3)  | -2(2)  | 14(3) | -15(3) |
| C(12) | 46(3) | 40(2)  | 31(2)  | 2(2)   | 16(2) | -7(2)  |
| C(13) | 35(3) | 35(2)  | 38(3)  | 2(2)   | 16(2) | -2(2)  |
| C(14) | 36(2) | 29(2)  | 43(2)  | -1(2)  | 18(2) | -3(2)  |

**# Supplementary Material (ESI) for Dalton Transactions**  
**# This journal is (c) The Royal Society of Chemistry 2007**

|       |       |       |       |        |       |        |
|-------|-------|-------|-------|--------|-------|--------|
| C(15) | 42(3) | 25(2) | 42(2) | 3(2)   | 18(2) | -1(2)  |
| C(16) | 49(3) | 33(2) | 47(3) | -2(2)  | 17(2) | -7(2)  |
| C(17) | 78(4) | 37(2) | 40(3) | -1(2)  | 20(3) | -10(3) |
| C(18) | 80(4) | 33(2) | 48(3) | 2(2)   | 33(3) | 2(3)   |
| C(19) | 59(3) | 32(2) | 55(3) | 1(2)   | 32(3) | 2(2)   |
| C(20) | 46(3) | 28(2) | 42(3) | 5(2)   | 22(2) | 1(2)   |
| C(21) | 33(2) | 47(2) | 38(3) | 5(2)   | 14(2) | -4(2)  |
| C(22) | 44(3) | 54(3) | 46(3) | -1(2)  | 18(2) | -5(2)  |
| C(23) | 64(4) | 74(4) | 40(3) | -2(3)  | 22(3) | -3(3)  |
| C(24) | 74(4) | 79(4) | 45(3) | 14(3)  | 19(3) | 1(3)   |
| C(25) | 64(4) | 59(3) | 60(3) | 23(3)  | 23(3) | 12(3)  |
| C(26) | 37(3) | 42(2) | 49(3) | 10(2)  | 15(2) | 2(2)   |
| C(27) | 46(3) | 36(2) | 46(3) | 2(2)   | 23(2) | -1(2)  |
| C(28) | 70(4) | 36(3) | 83(4) | 14(2)  | 42(3) | 10(2)  |
| C(29) | 54(3) | 31(2) | 69(4) | 0(2)   | 22(3) | 0(2)   |
| C(30) | 40(3) | 57(3) | 98(5) | -9(3)  | 21(3) | -5(3)  |
| C(31) | 64(4) | 71(4) | 80(4) | -11(3) | 12(3) | -10(3) |
| C(32) | 75(4) | 71(4) | 77(4) | -19(3) | 36(4) | -10(3) |
| C(33) | 53(3) | 51(3) | 95(4) | -12(3) | 39(3) | -3(3)  |
| C(34) | 39(3) | 31(2) | 79(4) | 0(2)   | 23(3) | -2(2)  |
| C(35) | 43(3) | 33(2) | 80(4) | 0(2)   | 6(3)  | -4(2)  |
| C(36) | 32(2) | 37(2) | 59(3) | 9(2)   | 8(2)  | -2(2)  |
| C(37) | 46(3) | 50(3) | 74(4) | 19(3)  | 9(3)  | -5(3)  |
| C(38) | 58(4) | 78(4) | 60(4) | 29(3)  | 15(3) | 2(3)   |
| C(39) | 51(3) | 65(3) | 54(3) | 6(2)   | 20(3) | 1(3)   |
| C(40) | 44(3) | 47(3) | 54(3) | 2(2)   | 19(2) | -2(2)  |
| C(41) | 31(2) | 38(2) | 50(3) | 7(2)   | 14(2) | 1(2)   |
| C(42) | 39(3) | 41(3) | 55(3) | 4(2)   | 14(2) | 0(2)   |

---

**# Supplementary Material (ESI) for Dalton Transactions**  
**# This journal is (c) The Royal Society of Chemistry 2007**

**Table S5.** Crystal data and structure refinement for **2**.

|                                          |                                                                                |                          |
|------------------------------------------|--------------------------------------------------------------------------------|--------------------------|
| Identification code                      | i6014                                                                          |                          |
| Empirical formula                        | C <sub>53</sub> H <sub>34</sub> N <sub>4</sub> O <sub>10</sub> Re <sub>2</sub> |                          |
| Formula weight                           | 1259.24                                                                        |                          |
| Temperature                              | 298(2) K                                                                       |                          |
| Wavelength                               | 0.71073 Å                                                                      |                          |
| Crystal system                           | Triclinic                                                                      |                          |
| Space group                              | <i>P</i> $\bar{1}$                                                             |                          |
| Unit cell dimensions                     | <i>a</i> = 13.3125(15) Å                                                       | <i>α</i> = 73.052(9)°.   |
|                                          | <i>b</i> = 13.6261(18) Å                                                       | <i>β</i> = 91.069(8)°.   |
|                                          | <i>c</i> = 15.5143(13) Å                                                       | <i>γ</i> = 119.326(11)°. |
| Volume                                   | 2320.9(4) Å <sup>3</sup>                                                       |                          |
| <i>Z</i>                                 | 2                                                                              |                          |
| Density (calculated)                     | 1.802 Mg/m <sup>3</sup>                                                        |                          |
| Absorption coefficient                   | 5.277 mm <sup>-1</sup>                                                         |                          |
| F(000)                                   | 1220                                                                           |                          |
| Crystal size                             | 0.40 x 0.30 x 0.20 mm <sup>3</sup>                                             |                          |
| Theta range for data collection          | 1.39 to 24.97°.                                                                |                          |
| Index ranges                             | 0 ≤ <i>h</i> ≤ 15, -16 ≤ <i>k</i> ≤ 14, -18 ≤ <i>l</i> ≤ 18                    |                          |
| Reflections collected                    | 8543                                                                           |                          |
| Independent reflections                  | 8153 [R(int) = 0.0326]                                                         |                          |
| Completeness to theta = 24.97°           | 100.0 %                                                                        |                          |
| Absorption correction                    | Psi-scan                                                                       |                          |
| Max. and min. transmission               | 0.4184 and 0.2267                                                              |                          |
| Refinement method                        | Full-matrix least-squares on <i>F</i> <sup>2</sup>                             |                          |
| Data / restraints / parameters           | 8153 / 0 / 587                                                                 |                          |
| Goodness-of-fit on <i>F</i> <sup>2</sup> | 0.994                                                                          |                          |
| Final R indices [I > 2σ( <i>I</i> )]     | R1 = 0.0340, wR2 = 0.0769                                                      |                          |
| R indices (all data)                     | R1 = 0.0993, wR2 = 0.0949                                                      |                          |
| Largest diff. peak and hole              | 1.127 and -0.736 e.Å <sup>-3</sup>                                             |                          |

**Table S6.** Atomic coordinates ( $\times 10^4$ ) and equivalent isotropic displacement parameters ( $\text{\AA}^2 \times 10^3$ ) for **2**. U(eq) is defined as one third of the trace of the orthogonalized  $U^{ij}$  tensor.

|       | x        | y        | z       | U(eq) |
|-------|----------|----------|---------|-------|
| Re(1) | 4341(1)  | 1587(1)  | 3988(1) | 27(1) |
| Re(2) | -1048(1) | 120(1)   | 7970(1) | 33(1) |
| C(1)  | 4797(8)  | 2187(10) | 2712(7) | 47(3) |
| C(2)  | 5774(8)  | 1634(8)  | 4020(6) | 35(2) |
| C(3)  | 3622(8)  | 9(8)     | 3913(6) | 35(2) |
| C(4)  | -1232(8) | -255(9)  | 9245(7) | 43(2) |
| C(5)  | -2297(9) | 416(10)  | 8041(7) | 47(3) |
| C(6)  | -2193(9) | -1516(9) | 8156(6) | 42(2) |
| C(11) | 3028(7)  | 803(7)   | 5923(6) | 25(2) |
| C(12) | 3064(7)  | 365(7)   | 6897(6) | 30(2) |
| C(13) | 3974(8)  | 196(8)   | 7194(6) | 37(2) |
| C(14) | 4014(9)  | -220(10) | 8098(7) | 55(3) |
| C(15) | 3131(10) | -492(11) | 8736(7) | 66(3) |
| C(16) | 2202(8)  | -359(8)  | 8459(6) | 42(2) |
| C(17) | 2153(7)  | 76(7)    | 7531(6) | 30(2) |
| C(18) | 1172(7)  | 222(7)   | 7240(6) | 27(2) |
| C(19) | 1179(7)  | 730(7)   | 6307(6) | 27(2) |
| C(20) | 247(7)   | 906(7)   | 6018(6) | 25(2) |
| C(21) | 256(7)   | 1426(7)  | 5050(6) | 26(2) |
| C(22) | -625(8)  | 1664(8)  | 4737(6) | 35(2) |
| C(23) | -608(8)  | 2143(8)  | 3828(6) | 36(2) |
| C(24) | 293(8)   | 2435(8)  | 3203(6) | 36(2) |
| C(25) | 1170(8)  | 2214(8)  | 3489(6) | 32(2) |
| C(26) | 1163(7)  | 1700(7)  | 4402(6) | 25(2) |
| C(27) | 2079(7)  | 1439(7)  | 4690(6) | 25(2) |
| C(28) | 2121(7)  | 1015(7)  | 5628(6) | 24(2) |
| C(31) | 5028(7)  | 4266(8)  | 3561(6) | 34(2) |
| C(32) | 5843(7)  | 3829(8)  | 4707(6) | 33(2) |
| C(33) | 6227(8)  | 3283(8)  | 5428(6) | 42(2) |
| C(34) | 7032(9)  | 4004(9)  | 5865(6) | 47(3) |

**# Supplementary Material (ESI) for Dalton Transactions**  
**# This journal is (c) The Royal Society of Chemistry 2007**

|       |           |          |          |         |
|-------|-----------|----------|----------|---------|
| C(35) | 7445(9)   | 5235(9)  | 5587(7)  | 55(3)   |
| C(36) | 7097(8)   | 5786(8)  | 4872(7)  | 45(2)   |
| C(37) | 6262(7)   | 5039(7)  | 4437(6)  | 31(2)   |
| C(38) | 5991(9)   | 6494(8)  | 3158(6)  | 44(2)   |
| C(39) | 5727(8)   | 6634(8)  | 2181(7)  | 40(2)   |
| C(40) | 5019(10)  | 7090(10) | 1916(9)  | 70(4)   |
| C(41) | 4781(14)  | 7304(15) | 1033(11) | 105(6)  |
| C(42) | 5259(14)  | 7096(16) | 416(10)  | 110(6)  |
| C(43) | 5983(10)  | 6631(11) | 670(7)   | 65(3)   |
| C(44) | 6217(8)   | 6375(8)  | 1562(7)  | 41(2)   |
| C(45) | 6990(8)   | 5845(9)  | 1763(7)  | 45(3)   |
| C(51) | 8720(8)   | 7697(8)  | 1875(6)  | 38(2)   |
| C(52) | 9599(8)   | 6993(8)  | 2834(6)  | 38(2)   |
| C(53) | 10352(9)  | 6819(10) | 3393(7)  | 52(3)   |
| C(54) | 10049(10) | 5680(10) | 3853(8)  | 63(3)   |
| C(55) | 9003(11)  | 4705(11) | 3781(8)  | 65(3)   |
| C(56) | 8237(9)   | 4855(9)  | 3232(7)  | 51(3)   |
| C(57) | 8562(8)   | 6024(8)  | 2769(6)  | 35(2)   |
| C(61) | 9784(17)  | 5841(17) | 929(13)  | 130(6)  |
| C(62) | 8894(15)  | 4878(15) | 799(11)  | 98(5)   |
| C(63) | 8102(17)  | 4744(18) | 196(13)  | 133(7)  |
| C(64) | 8360(16)  | 5876(17) | -392(12) | 124(6)  |
| C(65) | 9182(17)  | 6865(18) | -291(13) | 133(7)  |
| C(66) | 9912(15)  | 6935(16) | 333(12)  | 118(6)  |
| C(67) | 8620(20)  | 3730(20) | 1445(18) | 256(14) |
| N(1)  | 5072(6)   | 3359(6)  | 4124(5)  | 29(2)   |
| N(2)  | 5746(6)   | 5307(6)  | 3694(5)  | 33(2)   |
| N(3)  | 9656(6)   | 8027(7)  | 2266(5)  | 37(2)   |
| N(4)  | 8026(6)   | 6516(6)  | 2159(5)  | 37(2)   |
| O(1)  | 5143(7)   | 2599(8)  | 1938(5)  | 70(2)   |
| O(2)  | 6676(5)   | 1687(6)  | 4042(5)  | 53(2)   |
| O(3)  | 3214(6)   | -925(6)  | 3857(5)  | 52(2)   |
| O(4)  | -1366(7)  | -500(7)  | 10031(5) | 66(2)   |
| O(5)  | -3030(7)  | 602(9)   | 8153(6)  | 86(3)   |
| O(6)  | -2875(7)  | -2491(6) | 8319(5)  | 63(2)   |

**# Supplementary Material (ESI) for Dalton Transactions**  
**# This journal is (c) The Royal Society of Chemistry 2007**

|       |         |         |         |       |
|-------|---------|---------|---------|-------|
| O(7)  | 3902(5) | 1017(5) | 5406(4) | 31(1) |
| O(8)  | 2809(5) | 1667(5) | 4029(4) | 28(1) |
| O(9)  | -641(5) | 676(5)  | 6533(4) | 32(1) |
| O(10) | 386(5)  | -98(5)  | 7901(4) | 33(2) |

---

**Table S7.** Bond lengths [Å] and angles [°] for **2**.

---

|              |           |
|--------------|-----------|
| Re(1)-C(2)   | 1.878(9)  |
| Re(1)-C(1)   | 1.890(10) |
| Re(1)-C(3)   | 1.918(10) |
| Re(1)-O(7)   | 2.096(6)  |
| Re(1)-O(8)   | 2.097(5)  |
| Re(1)-N(1)   | 2.194(7)  |
| Re(2)-C(4)   | 1.882(10) |
| Re(2)-C(5)   | 1.905(10) |
| Re(2)-C(6)   | 1.922(11) |
| Re(2)-O(10)  | 2.079(5)  |
| Re(2)-O(9)   | 2.120(5)  |
| Re(2)-N(3)#1 | 2.201(7)  |
| C(1)-O(1)    | 1.158(11) |
| C(2)-O(2)    | 1.167(10) |
| C(3)-O(3)    | 1.144(10) |
| C(4)-O(4)    | 1.158(11) |
| C(5)-O(5)    | 1.149(11) |
| C(6)-O(6)    | 1.133(11) |
| C(11)-O(7)   | 1.283(9)  |
| C(11)-C(28)  | 1.413(11) |
| C(11)-C(12)  | 1.463(11) |
| C(12)-C(13)  | 1.387(11) |
| C(12)-C(17)  | 1.395(11) |
| C(13)-C(14)  | 1.361(12) |
| C(13)-H(13)  | 0.9300    |
| C(14)-C(15)  | 1.380(13) |
| C(14)-H(14)  | 0.9300    |
| C(15)-C(16)  | 1.379(13) |
| C(15)-H(15)  | 0.9300    |
| C(16)-C(17)  | 1.401(12) |
| C(16)-H(16)  | 0.9300    |
| C(17)-C(18)  | 1.460(11) |
| C(18)-O(10)  | 1.293(9)  |

**# Supplementary Material (ESI) for Dalton Transactions**  
**# This journal is (c) The Royal Society of Chemistry 2007**

|             |           |
|-------------|-----------|
| C(18)-C(19) | 1.408(11) |
| C(19)-C(20) | 1.416(11) |
| C(19)-C(28) | 1.472(10) |
| C(20)-O(9)  | 1.288(9)  |
| C(20)-C(21) | 1.460(11) |
| C(21)-C(22) | 1.406(11) |
| C(21)-C(26) | 1.411(11) |
| C(22)-C(23) | 1.366(12) |
| C(22)-H(22) | 0.9300    |
| C(23)-C(24) | 1.374(12) |
| C(23)-H(23) | 0.9300    |
| C(24)-C(25) | 1.378(11) |
| C(24)-H(24) | 0.9300    |
| C(25)-C(26) | 1.383(11) |
| C(25)-H(25) | 0.9300    |
| C(26)-C(27) | 1.458(11) |
| C(27)-O(8)  | 1.285(9)  |
| C(27)-C(28) | 1.412(11) |
| C(31)-N(1)  | 1.316(10) |
| C(31)-N(2)  | 1.342(10) |
| C(31)-H(31) | 0.9300    |
| C(32)-C(37) | 1.382(11) |
| C(32)-C(33) | 1.390(12) |
| C(32)-N(1)  | 1.394(10) |
| C(33)-C(34) | 1.379(12) |
| C(33)-H(33) | 0.9300    |
| C(34)-C(35) | 1.409(13) |
| C(34)-H(34) | 0.9300    |
| C(35)-C(36) | 1.358(13) |
| C(35)-H(35) | 0.9300    |
| C(36)-C(37) | 1.412(12) |
| C(36)-H(36) | 0.9300    |
| C(37)-N(2)  | 1.380(10) |
| C(38)-N(2)  | 1.457(11) |
| C(38)-C(39) | 1.529(13) |



**# Supplementary Material (ESI) for Dalton Transactions**  
**# This journal is (c) The Royal Society of Chemistry 2007**

|              |           |
|--------------|-----------|
| C(38)-H(38A) | 0.9700    |
| C(38)-H(38B) | 0.9700    |
| C(39)-C(40)  | 1.362(14) |
| C(39)-C(44)  | 1.384(13) |
| C(40)-C(41)  | 1.380(18) |
| C(40)-H(40)  | 0.9300    |
| C(41)-C(42)  | 1.32(2)   |
| C(41)-H(41)  | 0.9300    |
| C(42)-C(43)  | 1.388(18) |
| C(42)-H(42)  | 0.9300    |
| C(43)-C(44)  | 1.394(13) |
| C(43)-H(43)  | 0.9300    |
| C(44)-C(45)  | 1.504(12) |
| C(45)-N(4)   | 1.476(11) |
| C(45)-H(45A) | 0.9700    |
| C(45)-H(45B) | 0.9700    |
| C(51)-N(3)   | 1.305(11) |
| C(51)-N(4)   | 1.334(11) |
| C(51)-H(51)  | 0.9300    |
| C(52)-C(53)  | 1.377(13) |
| C(52)-N(3)   | 1.394(11) |
| C(52)-C(57)  | 1.395(12) |
| C(53)-C(54)  | 1.354(14) |
| C(53)-H(53)  | 0.9300    |
| C(54)-C(55)  | 1.409(15) |
| C(54)-H(54)  | 0.9300    |
| C(55)-C(56)  | 1.369(15) |
| C(55)-H(55)  | 0.9300    |
| C(56)-C(57)  | 1.381(12) |
| C(56)-H(56)  | 0.9300    |
| C(57)-N(4)   | 1.388(11) |
| C(61)-C(62)  | 1.34(2)   |
| C(61)-C(66)  | 1.44(2)   |
| C(61)-H(61)  | 0.9300    |
| C(62)-C(63)  | 1.38(2)   |

**# Supplementary Material (ESI) for Dalton Transactions**  
**# This journal is (c) The Royal Society of Chemistry 2007**

|                  |          |
|------------------|----------|
| C(62)-C(67)      | 1.46(3)  |
| C(63)-C(64)      | 1.41(2)  |
| C(63)-H(63)      | 0.9300   |
| C(64)-C(65)      | 1.31(2)  |
| C(64)-H(64)      | 0.9300   |
| C(65)-C(66)      | 1.35(2)  |
| C(65)-H(65)      | 0.9300   |
| C(66)-H(66)      | 0.9300   |
| C(67)-H(67A)     | 0.9600   |
| C(67)-H(67B)     | 0.9600   |
| C(67)-H(67C)     | 0.9600   |
| N(3)-Re(2)#1     | 2.201(7) |
|                  |          |
| C(2)-Re(1)-C(1)  | 84.0(4)  |
| C(2)-Re(1)-C(3)  | 89.3(4)  |
| C(1)-Re(1)-C(3)  | 88.6(4)  |
| C(2)-Re(1)-O(7)  | 95.2(3)  |
| C(1)-Re(1)-O(7)  | 176.8(4) |
| C(3)-Re(1)-O(7)  | 94.6(3)  |
| C(2)-Re(1)-O(8)  | 173.8(3) |
| C(1)-Re(1)-O(8)  | 98.9(3)  |
| C(3)-Re(1)-O(8)  | 96.2(3)  |
| O(7)-Re(1)-O(8)  | 81.6(2)  |
| C(2)-Re(1)-N(1)  | 93.3(3)  |
| C(1)-Re(1)-N(1)  | 93.7(4)  |
| C(3)-Re(1)-N(1)  | 176.7(3) |
| O(7)-Re(1)-N(1)  | 83.2(2)  |
| O(8)-Re(1)-N(1)  | 81.1(2)  |
| C(4)-Re(2)-C(5)  | 84.7(4)  |
| C(4)-Re(2)-C(6)  | 87.4(4)  |
| C(5)-Re(2)-C(6)  | 88.0(4)  |
| C(4)-Re(2)-O(10) | 94.6(3)  |
| C(5)-Re(2)-O(10) | 176.4(4) |
| C(6)-Re(2)-O(10) | 95.5(3)  |
| C(4)-Re(2)-O(9)  | 173.6(3) |

**# Supplementary Material (ESI) for Dalton Transactions**  
**# This journal is (c) The Royal Society of Chemistry 2007**

|                    |           |
|--------------------|-----------|
| C(5)-Re(2)-O(9)    | 99.1(3)   |
| C(6)-Re(2)-O(9)    | 97.9(3)   |
| O(10)-Re(2)-O(9)   | 81.3(2)   |
| C(4)-Re(2)-N(3)#1  | 93.6(4)   |
| C(5)-Re(2)-N(3)#1  | 95.4(4)   |
| C(6)-Re(2)-N(3)#1  | 176.6(3)  |
| O(10)-Re(2)-N(3)#1 | 81.2(3)   |
| O(9)-Re(2)-N(3)#1  | 81.0(2)   |
| O(1)-C(1)-Re(1)    | 175.9(10) |
| O(2)-C(2)-Re(1)    | 178.5(8)  |
| O(3)-C(3)-Re(1)    | 178.6(8)  |
| O(4)-C(4)-Re(2)    | 178.8(10) |
| O(5)-C(5)-Re(2)    | 174.4(9)  |
| O(6)-C(6)-Re(2)    | 176.0(8)  |
| O(7)-C(11)-C(28)   | 125.8(8)  |
| O(7)-C(11)-C(12)   | 114.0(7)  |
| C(28)-C(11)-C(12)  | 120.2(7)  |
| C(13)-C(12)-C(17)  | 119.7(8)  |
| C(13)-C(12)-C(11)  | 120.7(7)  |
| C(17)-C(12)-C(11)  | 119.6(8)  |
| C(14)-C(13)-C(12)  | 121.3(8)  |
| C(14)-C(13)-H(13)  | 119.3     |
| C(12)-C(13)-H(13)  | 119.3     |
| C(13)-C(14)-C(15)  | 119.8(9)  |
| C(13)-C(14)-H(14)  | 120.1     |
| C(15)-C(14)-H(14)  | 120.1     |
| C(16)-C(15)-C(14)  | 120.1(10) |
| C(16)-C(15)-H(15)  | 119.9     |
| C(14)-C(15)-H(15)  | 119.9     |
| C(15)-C(16)-C(17)  | 120.7(9)  |
| C(15)-C(16)-H(16)  | 119.7     |
| C(17)-C(16)-H(16)  | 119.7     |
| C(12)-C(17)-C(16)  | 118.4(8)  |
| C(12)-C(17)-C(18)  | 121.0(8)  |
| C(16)-C(17)-C(18)  | 120.6(8)  |

**# Supplementary Material (ESI) for Dalton Transactions**  
**# This journal is (c) The Royal Society of Chemistry 2007**

|                   |          |
|-------------------|----------|
| O(10)-C(18)-C(19) | 126.3(7) |
| O(10)-C(18)-C(17) | 114.2(7) |
| C(19)-C(18)-C(17) | 119.5(7) |
| C(18)-C(19)-C(20) | 120.0(7) |
| C(18)-C(19)-C(28) | 119.9(7) |
| C(20)-C(19)-C(28) | 120.0(7) |
| O(9)-C(20)-C(19)  | 126.6(8) |
| O(9)-C(20)-C(21)  | 113.7(7) |
| C(19)-C(20)-C(21) | 119.7(7) |
| C(22)-C(21)-C(26) | 118.4(8) |
| C(22)-C(21)-C(20) | 121.5(7) |
| C(26)-C(21)-C(20) | 120.0(7) |
| C(23)-C(22)-C(21) | 120.8(8) |
| C(23)-C(22)-H(22) | 119.6    |
| C(21)-C(22)-H(22) | 119.6    |
| C(22)-C(23)-C(24) | 120.5(8) |
| C(22)-C(23)-H(23) | 119.8    |
| C(24)-C(23)-H(23) | 119.8    |
| C(23)-C(24)-C(25) | 120.0(8) |
| C(23)-C(24)-H(24) | 120.0    |
| C(25)-C(24)-H(24) | 120.0    |
| C(24)-C(25)-C(26) | 121.0(8) |
| C(24)-C(25)-H(25) | 119.5    |
| C(26)-C(25)-H(25) | 119.5    |
| C(25)-C(26)-C(21) | 119.2(7) |
| C(25)-C(26)-C(27) | 120.3(7) |
| C(21)-C(26)-C(27) | 120.5(7) |
| O(8)-C(27)-C(28)  | 126.3(8) |
| O(8)-C(27)-C(26)  | 114.0(7) |
| C(28)-C(27)-C(26) | 119.7(7) |
| C(27)-C(28)-C(11) | 120.6(7) |
| C(27)-C(28)-C(19) | 119.8(7) |
| C(11)-C(28)-C(19) | 119.5(7) |
| N(1)-C(31)-N(2)   | 113.6(8) |
| N(1)-C(31)-H(31)  | 123.2    |

**# Supplementary Material (ESI) for Dalton Transactions**  
**# This journal is (c) The Royal Society of Chemistry 2007**

|                     |           |
|---------------------|-----------|
| N(2)-C(31)-H(31)    | 123.2     |
| C(37)-C(32)-C(33)   | 121.4(8)  |
| C(37)-C(32)-N(1)    | 108.1(8)  |
| C(33)-C(32)-N(1)    | 130.5(8)  |
| C(34)-C(33)-C(32)   | 116.7(9)  |
| C(34)-C(33)-H(33)   | 121.6     |
| C(32)-C(33)-H(33)   | 121.6     |
| C(33)-C(34)-C(35)   | 121.3(9)  |
| C(33)-C(34)-H(34)   | 119.3     |
| C(35)-C(34)-H(34)   | 119.3     |
| C(36)-C(35)-C(34)   | 122.6(9)  |
| C(36)-C(35)-H(35)   | 118.7     |
| C(34)-C(35)-H(35)   | 118.7     |
| C(35)-C(36)-C(37)   | 115.7(9)  |
| C(35)-C(36)-H(36)   | 122.2     |
| C(37)-C(36)-H(36)   | 122.2     |
| N(2)-C(37)-C(32)    | 107.3(7)  |
| N(2)-C(37)-C(36)    | 130.5(8)  |
| C(32)-C(37)-C(36)   | 122.2(8)  |
| N(2)-C(38)-C(39)    | 115.0(7)  |
| N(2)-C(38)-H(38A)   | 108.5     |
| C(39)-C(38)-H(38A)  | 108.5     |
| N(2)-C(38)-H(38B)   | 108.5     |
| C(39)-C(38)-H(38B)  | 108.5     |
| H(38A)-C(38)-H(38B) | 107.5     |
| C(40)-C(39)-C(44)   | 120.1(10) |
| C(40)-C(39)-C(38)   | 116.8(10) |
| C(44)-C(39)-C(38)   | 123.1(8)  |
| C(39)-C(40)-C(41)   | 120.8(13) |
| C(39)-C(40)-H(40)   | 119.6     |
| C(41)-C(40)-H(40)   | 119.6     |
| C(42)-C(41)-C(40)   | 120.7(14) |
| C(42)-C(41)-H(41)   | 119.6     |
| C(40)-C(41)-H(41)   | 119.6     |
| C(41)-C(42)-C(43)   | 119.5(13) |

**# Supplementary Material (ESI) for Dalton Transactions**  
**# This journal is (c) The Royal Society of Chemistry 2007**

|                     |           |
|---------------------|-----------|
| C(41)-C(42)-H(42)   | 120.3     |
| C(43)-C(42)-H(42)   | 120.3     |
| C(42)-C(43)-C(44)   | 121.2(12) |
| C(42)-C(43)-H(43)   | 119.4     |
| C(44)-C(43)-H(43)   | 119.4     |
| C(39)-C(44)-C(43)   | 117.6(10) |
| C(39)-C(44)-C(45)   | 125.8(9)  |
| C(43)-C(44)-C(45)   | 116.5(10) |
| N(4)-C(45)-C(44)    | 114.3(8)  |
| N(4)-C(45)-H(45A)   | 108.7     |
| C(44)-C(45)-H(45A)  | 108.7     |
| N(4)-C(45)-H(45B)   | 108.7     |
| C(44)-C(45)-H(45B)  | 108.7     |
| H(45A)-C(45)-H(45B) | 107.6     |
| N(3)-C(51)-N(4)     | 111.8(8)  |
| N(3)-C(51)-H(51)    | 124.1     |
| N(4)-C(51)-H(51)    | 124.1     |
| C(53)-C(52)-N(3)    | 131.6(9)  |
| C(53)-C(52)-C(57)   | 120.4(9)  |
| N(3)-C(52)-C(57)    | 108.0(8)  |
| C(54)-C(53)-C(52)   | 117.1(11) |
| C(54)-C(53)-H(53)   | 121.4     |
| C(52)-C(53)-H(53)   | 121.4     |
| C(53)-C(54)-C(55)   | 122.1(11) |
| C(53)-C(54)-H(54)   | 119.0     |
| C(55)-C(54)-H(54)   | 119.0     |
| C(56)-C(55)-C(54)   | 121.9(11) |
| C(56)-C(55)-H(55)   | 119.1     |
| C(54)-C(55)-H(55)   | 119.1     |
| C(55)-C(56)-C(57)   | 115.1(10) |
| C(55)-C(56)-H(56)   | 122.4     |
| C(57)-C(56)-H(56)   | 122.4     |
| C(56)-C(57)-N(4)    | 131.6(9)  |
| C(56)-C(57)-C(52)   | 123.4(9)  |
| N(4)-C(57)-C(52)    | 105.1(8)  |

**# Supplementary Material (ESI) for Dalton Transactions**  
**# This journal is (c) The Royal Society of Chemistry 2007**

|                     |           |
|---------------------|-----------|
| C(62)-C(61)-C(66)   | 113.0(18) |
| C(62)-C(61)-H(61)   | 123.5     |
| C(66)-C(61)-H(61)   | 123.5     |
| C(61)-C(62)-C(63)   | 132.3(19) |
| C(61)-C(62)-C(67)   | 116(2)    |
| C(63)-C(62)-C(67)   | 111.1(19) |
| C(62)-C(63)-C(64)   | 109.6(18) |
| C(62)-C(63)-H(63)   | 125.2     |
| C(64)-C(63)-H(63)   | 125.2     |
| C(65)-C(64)-C(63)   | 122(2)    |
| C(65)-C(64)-H(64)   | 118.9     |
| C(63)-C(64)-H(64)   | 118.9     |
| C(64)-C(65)-C(66)   | 125(2)    |
| C(64)-C(65)-H(65)   | 117.5     |
| C(66)-C(65)-H(65)   | 117.5     |
| C(65)-C(66)-C(61)   | 117.6(19) |
| C(65)-C(66)-H(66)   | 121.2     |
| C(61)-C(66)-H(66)   | 121.2     |
| C(62)-C(67)-H(67A)  | 109.5     |
| C(62)-C(67)-H(67B)  | 109.5     |
| H(67A)-C(67)-H(67B) | 109.5     |
| C(62)-C(67)-H(67C)  | 109.5     |
| H(67A)-C(67)-H(67C) | 109.5     |
| H(67B)-C(67)-H(67C) | 109.5     |
| C(31)-N(1)-C(32)    | 105.2(7)  |
| C(31)-N(1)-Re(1)    | 126.1(6)  |
| C(32)-N(1)-Re(1)    | 127.8(6)  |
| C(31)-N(2)-C(37)    | 105.7(7)  |
| C(31)-N(2)-C(38)    | 128.5(8)  |
| C(37)-N(2)-C(38)    | 125.7(7)  |
| C(51)-N(3)-C(52)    | 106.9(8)  |
| C(51)-N(3)-Re(2)#1  | 125.3(6)  |
| C(52)-N(3)-Re(2)#1  | 127.8(6)  |
| C(51)-N(4)-C(57)    | 108.2(8)  |
| C(51)-N(4)-C(45)    | 125.5(8)  |

**# Supplementary Material (ESI) for Dalton Transactions**  
**# This journal is (c) The Royal Society of Chemistry 2007**

|                   |          |
|-------------------|----------|
| C(57)-N(4)-C(45)  | 125.4(8) |
| C(11)-O(7)-Re(1)  | 133.0(5) |
| C(27)-O(8)-Re(1)  | 132.6(5) |
| C(20)-O(9)-Re(2)  | 131.6(5) |
| C(18)-O(10)-Re(2) | 133.1(5) |

---

Symmetry transformations used to generate equivalent atoms:

#1 -x+1,-y+1,-z+1



**Table S8.** Anisotropic displacement parameters ( $\text{\AA}^2 \times 10^3$ ) for **2**. The anisotropic displacement factor exponent takes the form:  $-2\pi^2[ h^2 a^{*2} U^{11} + \dots + 2 h k a^* b^* U^{12} ]$

|       | U11   | U22    | U33   | U23    | U13    | U12   |
|-------|-------|--------|-------|--------|--------|-------|
| Re(1) | 24(1) | 30(1)  | 27(1) | -11(1) | 0(1)   | 13(1) |
| Re(2) | 26(1) | 41(1)  | 27(1) | -9(1)  | 3(1)   | 16(1) |
| C(1)  | 37(6) | 64(7)  | 41(6) | -21(5) | -3(5)  | 23(6) |
| C(2)  | 32(5) | 28(5)  | 36(5) | -14(4) | 0(4)   | 7(4)  |
| C(3)  | 30(5) | 44(6)  | 36(5) | -15(5) | 1(4)   | 21(5) |
| C(4)  | 36(6) | 49(6)  | 45(6) | -15(5) | 4(5)   | 23(5) |
| C(5)  | 40(6) | 70(8)  | 33(6) | -14(5) | -1(5)  | 32(6) |
| C(6)  | 48(6) | 45(6)  | 27(5) | -9(5)  | -2(5)  | 21(5) |
| C(11) | 24(4) | 19(4)  | 36(5) | -11(4) | -2(4)  | 14(4) |
| C(12) | 29(5) | 32(5)  | 21(5) | -6(4)  | -2(4)  | 11(4) |
| C(13) | 30(5) | 48(6)  | 29(5) | -8(4)  | 2(4)   | 19(5) |
| C(14) | 52(7) | 93(9)  | 38(6) | -7(6)  | -5(5)  | 57(7) |
| C(15) | 63(8) | 97(10) | 38(7) | -4(6)  | -7(6)  | 52(8) |
| C(16) | 40(6) | 57(7)  | 23(5) | -8(5)  | 3(4)   | 23(5) |
| C(17) | 27(5) | 31(5)  | 38(5) | -13(4) | -5(4)  | 17(4) |
| C(18) | 27(5) | 32(5)  | 25(5) | -11(4) | -4(4)  | 17(4) |
| C(19) | 22(4) | 32(5)  | 25(5) | -9(4)  | 3(4)   | 12(4) |
| C(20) | 25(5) | 22(4)  | 34(5) | -17(4) | -5(4)  | 11(4) |
| C(21) | 28(5) | 26(5)  | 30(5) | -14(4) | -7(4)  | 16(4) |
| C(22) | 36(5) | 40(5)  | 38(6) | -11(4) | -5(4)  | 25(5) |
| C(23) | 38(5) | 42(6)  | 35(6) | -8(4)  | -10(4) | 28(5) |
| C(24) | 47(6) | 44(6)  | 28(5) | -13(4) | -11(4) | 29(5) |
| C(25) | 37(5) | 40(5)  | 31(5) | -14(4) | -4(4)  | 27(5) |
| C(26) | 21(4) | 18(4)  | 35(5) | -10(4) | -5(4)  | 9(4)  |
| C(27) | 21(4) | 15(4)  | 31(5) | -10(4) | 1(4)   | 2(4)  |
| C(28) | 26(5) | 18(4)  | 28(5) | -7(4)  | -4(4)  | 11(4) |
| C(31) | 33(5) | 43(6)  | 29(5) | -12(4) | -5(4)  | 21(5) |
| C(32) | 32(5) | 38(5)  | 33(5) | -21(4) | -3(4)  | 15(4) |
| C(33) | 49(6) | 40(6)  | 45(6) | -21(5) | -14(5) | 25(5) |
| C(34) | 63(7) | 53(7)  | 34(6) | -14(5) | -23(5) | 35(6) |

**# Supplementary Material (ESI) for Dalton Transactions**  
**# This journal is (c) The Royal Society of Chemistry 2007**

|       |        |         |        |        |         |        |
|-------|--------|---------|--------|--------|---------|--------|
| C(35) | 59(7)  | 51(7)   | 58(7)  | -31(6) | -29(6)  | 22(6)  |
| C(36) | 53(6)  | 32(5)   | 50(6)  | -20(5) | -10(5)  | 19(5)  |
| C(37) | 37(5)  | 22(5)   | 35(5)  | -9(4)  | -5(4)   | 16(4)  |
| C(38) | 53(6)  | 35(6)   | 47(6)  | -14(5) | -8(5)   | 26(5)  |
| C(39) | 34(5)  | 33(5)   | 47(6)  | -5(5)  | -9(5)   | 16(5)  |
| C(40) | 64(8)  | 64(8)   | 68(9)  | 0(7)   | -2(7)   | 35(7)  |
| C(41) | 95(12) | 125(14) | 90(12) | 0(11)  | -36(10) | 72(11) |
| C(42) | 92(12) | 146(16) | 42(9)  | 11(9)  | -29(8)  | 48(11) |
| C(43) | 54(7)  | 75(8)   | 36(6)  | -16(6) | -7(6)   | 13(7)  |
| C(44) | 29(5)  | 44(6)   | 43(6)  | -12(5) | -4(4)   | 14(5)  |
| C(45) | 42(6)  | 50(6)   | 46(6)  | -24(5) | 0(5)    | 21(5)  |
| C(51) | 35(5)  | 43(6)   | 35(5)  | -8(5)  | -5(4)   | 21(5)  |
| C(52) | 32(5)  | 40(6)   | 39(6)  | -11(5) | 6(4)    | 16(5)  |
| C(53) | 52(7)  | 59(7)   | 49(7)  | -9(6)  | -13(5)  | 35(6)  |
| C(54) | 66(8)  | 61(8)   | 67(8)  | -10(7) | -16(7)  | 42(7)  |
| C(55) | 74(9)  | 60(8)   | 55(8)  | -1(6)  | 14(7)   | 38(7)  |
| C(56) | 55(7)  | 37(6)   | 57(7)  | -13(5) | 2(6)    | 22(5)  |
| C(57) | 44(6)  | 36(5)   | 30(5)  | -7(4)  | -3(4)   | 25(5)  |
| N(1)  | 28(4)  | 27(4)   | 31(4)  | -10(3) | -3(3)   | 12(3)  |
| N(2)  | 38(4)  | 35(4)   | 28(4)  | -13(3) | -4(3)   | 19(4)  |
| N(3)  | 38(5)  | 40(5)   | 32(4)  | -10(4) | -3(4)   | 20(4)  |
| N(4)  | 26(4)  | 34(4)   | 38(4)  | -9(4)  | 6(3)    | 8(4)   |
| O(1)  | 67(5)  | 107(7)  | 26(4)  | -9(4)  | 9(4)    | 42(5)  |
| O(2)  | 30(4)  | 62(5)   | 75(5)  | -29(4) | -3(4)   | 27(4)  |
| O(3)  | 55(5)  | 46(4)   | 67(5)  | -35(4) | -13(4)  | 25(4)  |
| O(4)  | 77(6)  | 91(6)   | 27(4)  | -6(4)  | 9(4)    | 46(5)  |
| O(5)  | 65(6)  | 135(9)  | 88(7)  | -34(6) | -3(5)   | 73(6)  |
| O(6)  | 64(5)  | 45(5)   | 59(5)  | -13(4) | 10(4)   | 13(4)  |
| O(7)  | 27(3)  | 37(4)   | 31(3)  | -9(3)  | -5(3)   | 19(3)  |
| O(8)  | 28(3)  | 36(3)   | 21(3)  | -6(3)  | 3(3)    | 17(3)  |
| O(9)  | 24(3)  | 42(4)   | 26(3)  | -9(3)  | 1(3)    | 16(3)  |
| O(10) | 28(3)  | 43(4)   | 24(3)  | -1(3)  | 7(3)    | 20(3)  |

---
